# Supplementary material
Source: PubMed Central journal article supplement (PMC1315384)
Supplement: plntcell_tpc.105.036640_4.pdf [file plntcell_tpc.105.036640_4.pdf]

**Supplemental Table 1.** Oligonucleotides used for the preparation of the different constructs<sup>1</sup>.

| CONSTRUCT                |            | OLIGONUCLEOTIDES                                                                       |
|--------------------------|------------|----------------------------------------------------------------------------------------|
| <i>gPHF1</i>             | 1          | GGAATTCGTTCTTGATGGGACGCGCATGGGAGTCG                                                    |
|                          | 2          | GGGGTACCTGACTCTGACGGTCACGCGACTCACGACG                                                  |
| <i>oPHF1</i>             | 1          | CGGGATCCATGGAGATTGAAGAAGCGAGTCGTGAAAG                                                  |
|                          | 2          | CGAGCTCCTATAGGTCCAAGTTCCACCTACTATG                                                     |
| <i>PHF1:GFP</i>          | 1          | attB1–GTTCTTGATGGGACGCGCATGGGAGTCG                                                     |
|                          | 2          | attB2– TCCGCCACCCCCTCC -<br>TAGGTCCAAGTTCCACCTACTATGATCCTCAGAAG                        |
| <i>oPHF1:GFP</i>         | 1          | attB1–TGCATGGAGATTGAAGAAGCGAGTCGTG                                                     |
|                          | 2          | attB2– TCCGCCACCCCCTCC -<br>TAGGTCCAAGTTCCACCTACTATGATCCTCAGAAG                        |
| <i>PHT1;1:GFP</i>        | 1          | attB1–AGCCGCAAGAGATGACCAAGACGGAC                                                       |
|                          | 2          | attB2–TTTCTCGTCATGGCTAACCTCAGCC                                                        |
| <i>35S:PHT1;1:GFP</i>    | 1          | attB1–TTTATGGCCGAACAACAACACTAGGAGTG                                                    |
|                          | 2          | attB2–TTTCTCGTCATGGCTAACCTCAGCC                                                        |
| <i>35S::DsRed2::KDEL</i> | <b>SP1</b> | CATGGAAGGAGATATAACAATGAAGACTAATCTTTTTTCTC<br>TTTTCTCATCTTTTCACTTCTCCTATCATTATCCTCGGCCG |
|                          | <b>SP2</b> | AATTCGGCCGAGGATAATGATAGGAGAAGTGAAAAGAT<br>GAGAAAGAGAAAAAATTAGTCTTCATTGTTATATCTCCC      |
|                          | <b>DR1</b> | GGAATTCGCCTCCTCCGAGAACGTCATCACCGAGTTC                                                  |
|                          | <b>DR2</b> | GAAGATCTTTAAAGCTCATCCTTCAGGAACAGGTGGTG.                                                |

<sup>1</sup> 1 and 2 correspond to oligonucleotides complementary to the 5' and 3' part of the gene, respectively. SP1 and SP2 are complementary oligonucleotides encoding a signal peptide. DS1 and DS2 amplify Ds2Red2 and introduce a KDEL motif.
