# Supplementary material
Source: PubMed Central journal article supplement (PMC1315384)

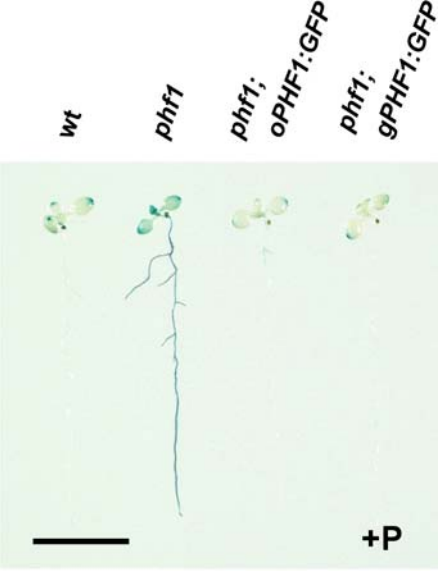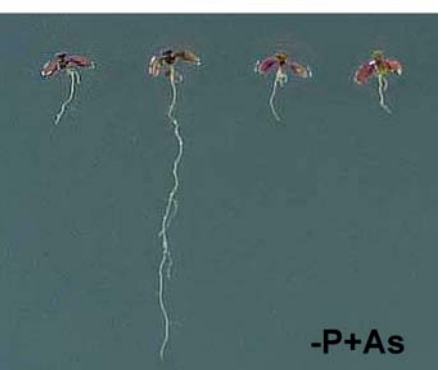

Supplement: plntcell_tpc.105.036640_2.pdf [file plntcell_tpc.105.036640_2.pdf]

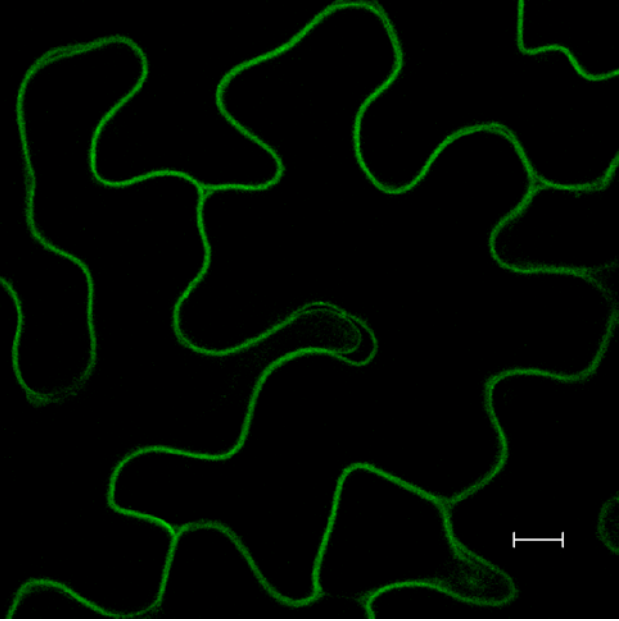

Supplement: plntcell_tpc.105.036640_3.pdf [file plntcell_tpc.105.036640_3.pdf]
